# Supplementary material for: USP39 regulates the cell cycle, survival, and growth of human leukemia cells
Source: Oxford University Press journal article supplement (doi:10.1042/bsr20190040), 2019-03-21
Supplement: bsr-2019-0040_supp.pdf [file bsr-2019-0040_supp.pdf]

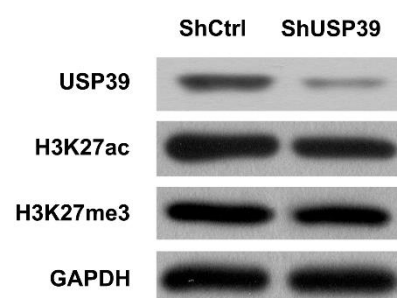

**Supplementary Figure 1 Effects of USP39 knockdown on histone modification.** HL-60 cells were infected with lentivirus expressing short-hairpin RNA (shRNA) targeting *USP39* or control shRNA for 48 hours, then the cells were subjected to western blot assay.
